# Supplementary material
Source: PubMed Central journal article supplement (PMC3663507)
Supplement: supp_M112.426726_jbc.M112.426726-1.pdf [file supp_M112.426726_jbc.M112.426726-1.pdf]

Sphingosine-1-phosphate (S1P) receptor agonists mediate pro-fibrotic responses in normal human lung fibroblasts via S1P<sub>2</sub> and S1P<sub>3</sub> receptors and Smad-independent signaling

**Supplemental Information**

Katrin Sobel, Katalin Menyhart, Nina Killer, Bérengère Renault, Yasmina Bauer, Rolf Studer, Beat Steiner, Martin H. Bolli, Oliver Nayler and John Gatfield

Supplementary Figure 1

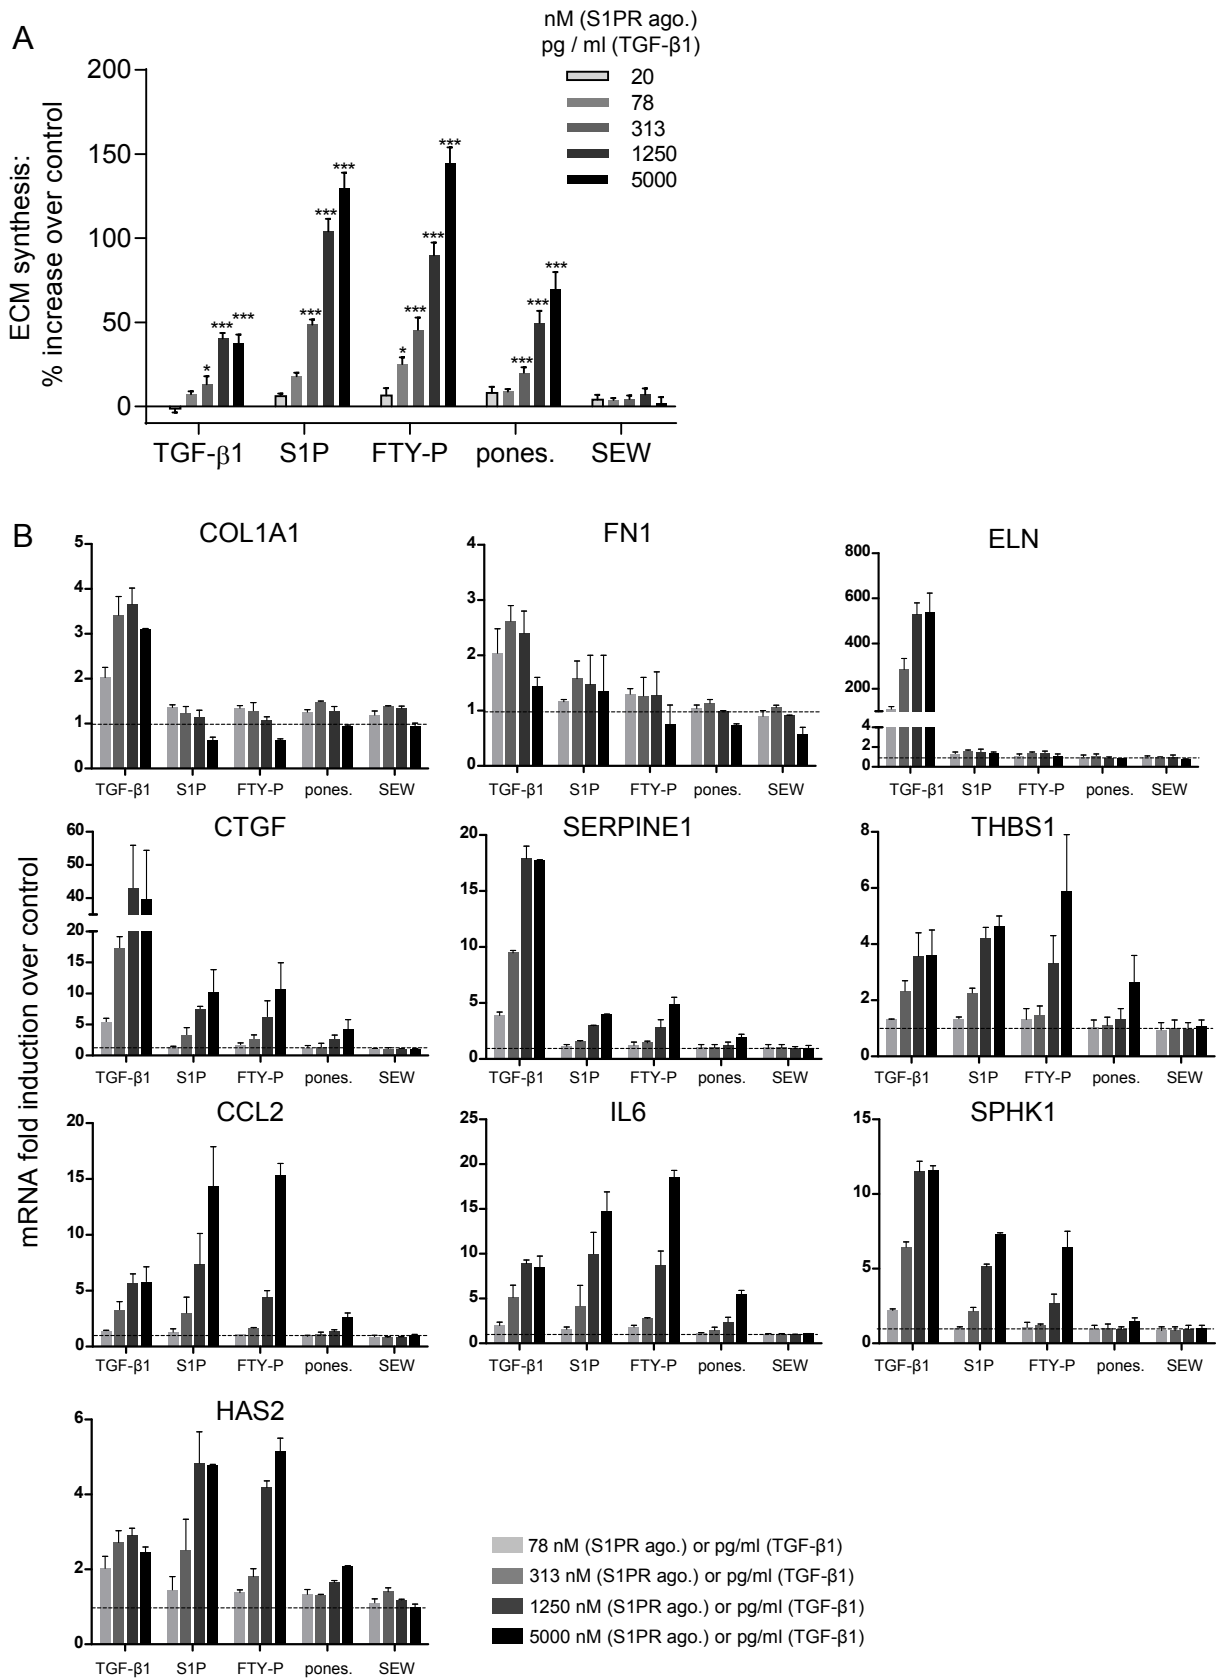

*Suppl. Fig. 1: Analysis of ECM synthesis and regulation of pro-fibrotic gene expression in NHLF isolated from a second, independent donor*

**(A)** NHLF were stimulated with TGF- $\beta$ 1 (20-5000 pg/ml) or S1PR agonists (20-5000 nM) and ECM synthesis was measured after 24 h with the  $^3\text{H}$ -proline incorporation assay. Data represent mean + SEM of 5 independent experiments, \* =  $p < 0.05$ , \*\*\* =  $p < 0.001$ , one-way ANOVA, Dunnett post test. **(B)** qPCR of pro-fibrotic gene expression after stimulation of NHLF with TGF- $\beta$ 1 (78-5000 pg/ml) or S1PR agonists (78-5000 nM) for 8 h. Normalization was performed using B2M, HPRT1, 18s and PPIA, which were selected by GENORM application (1). Data are mean + SEM of two independent experiments. Dashed lines show the control level of gene expression.

(1) Vandesompele, J., De Preter, K., Pattyn, F., Poppe, B., Van Roy, N., De Paepe, A., and Speleman, F. (2002) Accurate normalization of real-time quantitative RT-PCR data by geometric averaging of multiple internal control genes. *Genome Biol* **3**, RESEARCH0034.

## Supplementary Figure 2

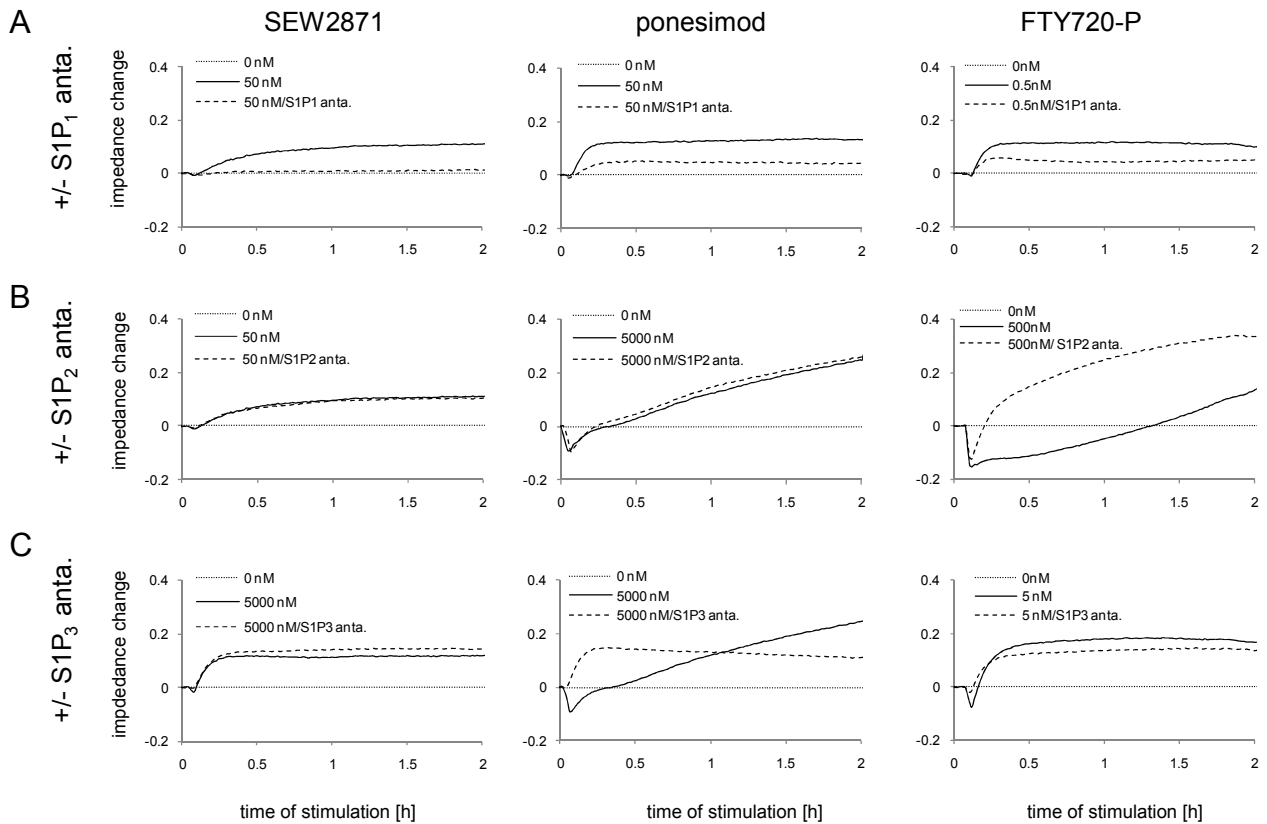

*Suppl. Fig. 2 Analysis of S1PR subtype signaling in NHLF using impedance assays*

NHLF were pre-incubated with or without 1  $\mu$ M S1P<sub>1</sub>R antagonist W146 (A), 0.2  $\mu$ M S1P<sub>2</sub>R antagonist JTE-013 (B) or 1.25  $\mu$ M S1P<sub>3</sub>R antagonist TY-52156 (C) for 1 h before stimulation with various concentrations of SEW2871, ponesimod or FTY720-P. Signaling was monitored over 2 h. Data in A, B show representative experiments, n=3.

(A) The S1P<sub>1</sub>R antagonist reduced the increase in impedance induced by SEW2871 (50 nM), ponesimod (50 nM) and FTY720-P (0.5 nM), confirming that the increase in impedance reflects the S1P<sub>1</sub>R response.

(B) Pre-incubation with the S1P<sub>2</sub>R antagonist did not affect SEW2871 (50nM)- and ponesimod (5  $\mu$ M)-induced impedance responses, demonstrating that no S1P<sub>2</sub>R activation was measurable. In contrast, the FTY720-P (500 nM)-induced prolonged decrease in impedance was completely reversed to increase above baseline in the presence of S1P<sub>2</sub>R antagonist, while the first, rapid decrease was unaffected. This demonstrates that the prolonged decrease in impedance represents S1P<sub>2</sub>R activation.

(C) Pre-incubation with the S1P<sub>3</sub>R antagonist did not affect the SEW2871 (5  $\mu$ M)-induced increase in impedance. In contrast, the rapid ponesimod (5  $\mu$ M)-induced decrease was completely inhibited by the antagonist. Also the rapid decrease induced by 5 nM FTY720-P, a concentration that did not yet induce a S1P<sub>2</sub> response, was inhibited in presence of S1P<sub>3</sub>R antagonist. These data confirm that the first rapid decrease represents S1P<sub>3</sub>R activation.

*Supplementary Table 1*

List of TaqMan assays from Applied Biosystems that were used for mRNA detection.

| <b>Gene</b>      | <b>Assay number<br/>(Applied<br/>Biosystems)</b> |
|------------------|--------------------------------------------------|
| 18S              | 4319413E                                         |
| B2M              | 4310886E                                         |
| CCL2             | Hs00234140_m1                                    |
| COL1A1           | Hs00164004_m1                                    |
| CTGF             | Hs00170014_m1                                    |
| ELN              | Hs00355783_m1                                    |
| FN1              | Hs01565277_m1                                    |
| HAS2             | Hs01052031_m1                                    |
| HPRT1            | 4326321E                                         |
| IL6              | Hs00985639_m1                                    |
| PPIA             | 4326316E                                         |
| SERPINE1         | Hs01126606_m1                                    |
| SPHK1            | Hs00184211_m1                                    |
| S1P <sub>1</sub> | Hs00173499_m1                                    |
| S1P <sub>2</sub> | Hs00244677_s1                                    |
| S1P <sub>3</sub> | Hs00245464_s1                                    |
| S1P <sub>4</sub> | Hs02330084_s1                                    |
| S1P <sub>5</sub> | Hs00258220_s1                                    |
| THBS1            | Hs00962908_m1                                    |
